1 **Characterization of gustatory receptor 7 in the brown planthopper reveals functional**  
2 **versatility**

3 Running title: *NIGr7* reveals functional versatility

4 Abhishek Ojha, Wenqing Zhang □

5 State Key Laboratory of Biocontrol and School of Life Sciences, Sun Yat-sen University,  
6 Guangzhou, Guangdong 510275, China.

7 First author should be addressed; Abhishek Ojha, Email: abhishekitrc@rediffmail.com

8 □ Corresponding author should be addressed; Wenqing Zhang,

9 Email: lsszwq@mail.sysu.edu.cn, Tel: +862039332963; Fax: +862039943515.

10

11

12

13

14 **Abstract**

15 Insect pests consume tastants as their necessary energy and nutrient sources. Gustatory  
16 receptors play important roles in insect life and can form within an extremely complicated  
17 regulatory network. However, there are still many gustatory genes that have a significant  
18 impact on insect physiology, but their functional mechanism is still unknown. Here, we  
19 purified and characterized a gustatory receptor (protein) coding gene, *NIGr7*, from the brown  
20 planthopper (BPH) *Nilaparvata lugens*, which is an important insect pest of rice. Our results  
21 revealed that *NIGr7* has an active association with various ligands, such as lectins, lipids  
22 (phospho- and sphingolipid) and copper. The mass-spectrometry result showed that *NIGr7* is  
23 a sugar receptor, and *NIGr7* is validated by different types of insoluble polysaccharides and a  
24 varied range of tastants. Furthermore, we observed that *NIGr7*-bound ATP hydrolysed on the  
25 ATPase activity assay, which indicated that *NIGr7* may be associated with important  
26 biological functions in the BPH. The important *NIGr7* for chemoreception has now been  
27 characterized in the BPH. We showed that *NIGr7* in the BPH is required for various protein-  
28 ligands, as well as protein-sugars interactions, to play crucial roles in this pest. This study  
29 will provide valuable information for further functional studies of chemoreception  
30 mechanisms in this important agricultural pest.

31 **Keywords:** Sugar gustatory receptor, *Nilaparvata lugens*, Protein purification, Protein-  
32 ligands binding, ATP hydrolysis.

### 33 **Introduction**

34 Arthropods' gustatory receptors (Grs) are active in leading insect feeding behaviours and in  
35 establishing the platform between insect gustation and the environment. The Grs are closely  
36 associated with insect olfactory receptors (Ors) (**Robertson et al., 2003**). Grs have been  
37 investigated as divergent domains of seven-TM (transmembrane) spanning proteins, which is  
38 a typical example of G protein-coupled receptors (GPCRs), but they are noticeably diverse  
39 and impart no sequence resemblance with Grs of mammals (**Clyne et al., 2000**). In addition,  
40 the topology of Gr' seven-TM helices are reversed in comparison to that of the GPCRs  
41 (**Zhang et al., 2011**). Although having well-established information on olfaction (**Benton et**  
42 **al., 2006; Robertson et al., 2006**) and increasing documentation of insect Grs, little known  
43 about the physiological mechanisms that include understanding of the gustation system.

44 The *Gr* genes were first established in *Drosophila* (**Clyne et al., 2000**), which is a  
45 polyphagous dipteran insect, and forty-three putative *Gr* genes have been revealed in this  
46 insect (**Amrein and Throne, 2005**). Grs have been documented into various clades and are  
47 named as sugar (**Slone et al., 2007**), bitter (**Wanner and Robertson, 2008; Lee et al., 2009**),  
48 carbon dioxide (CO<sub>2</sub>) (**Xu and Anderson, 2015**), GR43a-like (**Kui et al., 2018**), sex  
49 attractant (**Shankar et al., 2015**), and unknown (**Kui et al., 2018**) receptors, based on their  
50 sequence homologies with receptors that have been discovered in *Drosophila* (**Robertson et**  
51 **al., 2003**) or on an important molecule to which they reacted (**Kui et al., 2018**). Seventy-six  
52 and 79 *Gr* genes have been respectively identified in *Anopheles gambiae* (**Hill et al., 2002**)  
53 and *Aedes aegypti* (**Kent et al., 2008**), which is a hematophagous dipteran insect. Sixty-five  
54 and 197 *Gr* genes have been noted in the lepidopteran insects *Bombyx mori* (**Wanner and**  
55 **Robertson, 2008**) and *Helicoverpa armigera* (**Xu et al., 2016**), respectively. The highest  
56 number of *Gr* genes, 220, has been observed in *Tribolium castaneum*, which is a Coleopteran  
57 insect (**Richards et al., 2008**). Currently, the majority of research consideration has been  
58 focused on the *Gr* genes of *Drosophila* (**Slone et al., 2007; Dunipace et al., 2001; Gardiner**  
59 **et al., 2008; Weiss et al., 2011; Dahanukar et al., 2001; Dahanukar et al., 2007**); however,  
60 with fast-growing genome examinations on an additional species of insects (**Robertson and**  
61 **Wanner, 2006; Wanner and Robertson, 2008; Richards et al., 2008; Smadja et al., 2009;**  
62 **Xue et al., 2014**), the investigation is approaching a different spectrum of species. However,  
63 there is a need to shed light on the *Gr* genes in an important agricultural insect, such as the  
64 brown planthopper. The brown planthopper (BPH), *Nilaparvata lugens* (Stål) (Hemiptera:  
65 Delphacidae), is one of the most serious agricultural planthopper species and feeds on rice

66 plants (Ojha and Zhang, 2019). Recently, thirty-two putative *Gr* genes in this insect have  
67 been reported from our research group (Kui et al., 2018). However, the gustatory perception  
68 of these *Gr* genes, or the protein macromolecular platform, in the physiology of this insect  
69 has remained largely unknown.

70 In the present investigation, the functional properties of BPH *Gr7* (*NIGr7*, protein) have been  
71 revealed after homologous expression in *E. coli*. Purified *NIGr7* was examined for its  
72 association with lectins, lipids, polysaccharides, metals, and ATPase activity assays. These  
73 results are essential for understanding the molecular level of taste regulation within the BPH  
74 feeding behaviour and improve our understanding of the insect sugar-receptor family, insect-  
75 plant interaction and adaptation.

## 76 **Materials and Methods**

### 77 **Insect sample**

78 The BPH strain was maintained and reared on susceptible rice (Huang Hua Zhan) plants as  
79 described by Kui et al (2018).

### 80 **Bioinformatics**

81 The *NIGr7* (protein) sequence was examined for different parameters, including the  
82 molecular weight, theoretical pI, amino acid composition, atomic composition, extinction  
83 coefficient, estimated half-life, instability index, aliphatic index and grand average of  
84 hydropathicity, by using an ExPASy ProtParam tool (<https://web.expasy.org/protparam/>).  
85 The TOPCONS tool was used to predict a secretory signal sequence and the transmembrane  
86 helix in the *NIGr7* (<http://topcons.cbr.su.se/>). Furthermore, the *NIGr7* sequence was searched  
87 with other known annotated insect Grs for sequence identity and to build a phylogenetic tree  
88 using protein BLAST tools from the NCBI weblink  
89 (<https://www.ncbi.nlm.nih.gov/blast/treeview/treeView>).

### 90 **Cloning, expression, purification and biotin labelling of *NIGr7***

91 The total RNA of the female adult BPH was isolated by using a TRIzol reagent (Invitrogen,  
92 Carlsbad, CA), and one µg RNA was converted to cDNA by using the PrimeScript™ RT-  
93 PCR Kit (Takara, Japan) following the manufacturer's instructions. Then, 10 ng cDNA was  
94 used as a template for PCR to amplify *NIGr7* using the forward primer 5'-CATATC-  
95 ATGTTGTTACTGACAATTGTTTTGATT-3' containing an *NdeI* sequence and the reverse  
96 primer 5'-GAATTC-TCACTGTGTTCTGCGCGTTT-3' containing an *EcoRI* sequence. A

97 PCR was carried out in 25  $\mu$ l containing 200  $\mu$ M dNTPs, 5 U *Taq* DNA polymerase (New  
98 England Biolabs, NEB, Inc, USA) and 13  $\mu$ M of each of the primers. The PCR conditions  
99 were 95°C for 2 min, followed by 35 cycles at 95°C for 30 s, 55°C for 30 s, and 72°C for 30  
100 s, with a final extension step at 72°C for 5 min. Amplicon (~730 bp) was analysed on 1%  
101 (w/v) agarose gel, was gel-purified using HiPure Gel Pure DNA Micro kit (Magen, China)  
102 following the manufacturer's instructions and was quantified using the NanoVue Plus  
103 spectrophotometer. The PCR product was digested with *NdeI* and *EcoRI* and was ligated to  
104 pMAL-c5X (NEB, Inc, USA). *Escherichia coli* (*E. coli*, DH5 $\alpha$ ) was used for transformation  
105 of the pMAL-c5X-*NIGr7* plasmid. The transformed bacteria were selected by screening the  
106 colonies on ampicillin (50  $\mu$ g/ml) containing media and plasmid purification. Then, the  
107 colonies were further analysed by restriction enzyme digestion and PCR. The *NIGr7* gene of  
108 the recombinant plasmid was sequenced by the Sanger method. The expression host *E.*  
109 *coli* BL21(DE3)pLysS was used as a transformation host for the pMAL-c5X-*NIGr7* vector. A  
110 single colony of transformed *E. coli* BL21(DE3)pLysS with pMAL-c5X-*NIGr7* was  
111 incubated overnight in a shaking incubator in 500 ml Luria Bertani (LB) medium containing  
112 ampicillin (50  $\mu$ g/ml) and chloramphenicol (34  $\mu$ g/ml) at 37°C with constant agitation (200  
113 rpm). The transformed cells at 25°C (OD<sub>600</sub> = 0.6) were induced with 0.5 mM isopropyl b-D-  
114 thiogalactopyranoside (IPTG; Sigma, USA), which resulted in the expression of the maltose-  
115 binding protein (MBP)-tagged *NIGr7* protein. After 8 h of induction, the cells were harvested  
116 at 5,000g for 15 min. The pellet was resuspended in a lysis buffer containing 50 mM Tris-  
117 HCl, pH 8.0, 200 mM NaCl, 3 mM  $\beta$ -ME, 10% v/v glycerol, and 0.15 mg/ml lysozyme. Cells  
118 were lysed by sonication (50 Hz, 20 cycles, with each cycle consisting of 20 s on- and 120 s  
119 off-time, 4°C), and the sonicated suspension was centrifuged at 20,000g for 30 min. The  
120 cleared supernatant was applied to amylose beads (NEB, Inc, USA), and protein was eluted  
121 with buffer 25 mM Tris-HCl pH 8.0, 200 mM NaCl, 3 mM  $\beta$ -ME and 10 mM maltose.  
122 Eluted *NIGr7* protein fractions were checked by SDS-PAGE (12%), and the pure fractions  
123 were pooled. The eluted *NIGr7* protein fractions were applied on a 10 kDa cut-off Centricon  
124 centrifugal device (Merck Pte. Ltd., Germany) for desalting against buffer (25 mM Tris-HCl,  
125 pH 8.0, 10 mM NaCl) and were concentrated to 56.75 mg/ml.

126 Cleavage of the MBP tag from *NIGr7* was completed according to manual instructions  
127 of the pMAL protein fusion and purification system (NEB, Inc, USA). The tag (MBP) was  
128 removed by incubating with Factor Xa at 4°C for 3 h. The cleaved *NIGr7* protein was  
129 concentrated by using a 10 kDa cut-off Centricon centrifugal device (Merck Pte. Ltd.,  
130 Germany) and was purified by affinity chromatography on amylose resin (NEB, Inc, USA)

131 equilibrated with 20 mM Tris-HCl, pH 8.0, 200 mM NaCl, and 2 mM DTT; then, it was  
132 purified by a benzamidine column (GE Healthcare, USA) equilibrated with 20 mM Tris-HCl,  
133 pH 8.0, 200 mM NaCl and 2 mM DTT. Unbound *N/Gr7* fractions were checked by SDS-  
134 PAGE and were concentrated to 10.00 mg/ml and stored at -80°C. Subsequently, the purified  
135 protein of *N/Gr7* was analysed using LC-MS/MS (Q-TOF). The labelling of *N/Gr7* with  
136 biotin was completed as described by Ojha et al (2014). The expression and purification of  
137 the MBP (as a control protein) was completed as described above. The protein was  
138 concentrated to 61.77 mg/ml and stored at -80°C.

### 139 **Protein-lectin-binding assay**

140 To study lectin binding with *N/Gr7*, 96-well Nunc microtiter plates (Fisher Scientific,  
141 Waltham, MA) were coated with *N/Gr7* in (100 ng; 50 µl/well) overnight (15-16 h, at 4°C).  
142 The plates were washed to remove unbound proteins, were blocked with 3% bovine albumin  
143 serum in Tris buffer and were incubated for 2 h at 100 rpm at room temperature. Additional  
144 biotinylated lectins (20 µg/ 50 µl; Vector Labs, Burlingame, CA) were added to each well  
145 and were incubated for 2 h at room temperature. Then, the plates were washed thrice with  
146 Tris buffer containing 0.05% Tween-20 to remove unbound or weakly bound biotinylated  
147 lectins, followed by incubation with streptavidin-HRP (1:2,000, 1 h, room temperature). The  
148 HRP activity was measured using a 50 µl TMB substrate solution (TransGen Biotech Co.,  
149 LTD, China) containing 0.06% of 30% v/v hydrogen peroxide (H<sub>2</sub>O<sub>2</sub>) in each well. After 20  
150 min, the reaction was stopped by adding 50 µl sulfuric acid (0.5 N) to each well. The  
151 absorbance was measured at 450 nm using an ELISA plate reader. The appropriate negative  
152 control was included, and the tests were run in quadruplicate.

### 153 **Protein lipid overlay (PLO) assay**

154 To test the binding ability of MBP-*N/Gr7* and MBP to various lipids, the well-established  
155 protein-lipid overlay (PLO) assay was performed using PIP and sphingo strips (Molecular  
156 Probes, USA) according to the manufacturer's instructions. These strips contained 100 pmol  
157 of various phospholipids and sphingolipids, which were spotted and immobilized on a  
158 nitrocellulose membrane. The purified MBP-*N/Gr7* was overlaid on PIP and sphingo strips.  
159 The purified MBP was used as an experimental control. Approximately 25 µg/ml protein was  
160 incubated with the strips in TBS-T (contained 3% BSA, Biotechnology Co. Ltd, Guangzhou,  
161 Xiang Bo) overnight at 4°C. The strips were then washed with TBS-T/BSA three times with  
162 gentle agitation for 10 min each wash, at room temperature. The MBP-*N/Gr7* and MBP  
163 interaction with spotted lipids were detected by subsequently blocking the strips in TBS-T  
164 buffer (10 mM Tris, pH 7.5, 70 mM NaCl, and 0.1% Tween) with 3% BSA and then

165 incubating the strips in 1:2000 dilution of monoclonal anti-MPB-HRP antibody (NEB, Inc,  
166 USA) in a blocking buffer for 1 h at room temperature. After thorough washing, a horse  
167 reddish peroxidase signal was detected by using 3,3'-diaminobenzidine tetrahydrochloride  
168 (DAB, Thermo Scientific) to yield an insoluble brown product. The intensity of the signals  
169 was analysed by using ImageJ.

#### 170 **An electrophoretic mobility shift assay (EMSA) for a metal-binding assay**

171 The metal-binding properties of *NIGr7* were confirmed by mixing purified *NIGr7*  
172 (approximately 0.75 µg/5 µl) with equal volumes of the following solutions: 0.5 mM (final  
173 concentration) EDTA or 0.015, 0.05, 0.15, 0.5, or 1.0 mM metals (CuSO<sub>4</sub>, and CaCl<sub>2</sub>). Each  
174 mixture was incubated for 30 min at 25°C, was added to 10 µl Laemmli sample buffer, and  
175 then was subjected to 12% SDS-PAGE under reducing/non-heating conditions. As a negative  
176 control, we used the maltose-binding protein for metal-binding assay.

#### 177 **ATPase activity assay with purified *NIGr7***

178 The ATPase activity assay was performed in 96-well microtitre plates by using an  
179 ATPase/GTPase activity assay kit (Sigma-Aldrich, USA) according to the manufacturer's  
180 instructions. An aliquot of *NIGr7*-purified protein (6.25, 12.5, 25, 50, 100 µg/well) was mixed  
181 with a 5 µl assay buffer to make 10 µl of the ATPase activity assay sample. The phosphate  
182 standards and blank control for colorimetric detection were prepared according to the  
183 manufacturer's instructions of the ATPase/GTPase activity assay kit. An aliquot of 30 µl  
184 reaction mix (made with 20 µl assay buffer plus 10 µl 4 mM ATP solution) was added into  
185 each ATPase activity assay sample. After incubation at room temperature for 30 min, 200 µl  
186 reagent was added to each sample to terminate the enzyme reaction, and all samples were  
187 incubated for an additional 20 min. At this step, the transparent reaction mix suddenly  
188 changed to a fine green endpoint colour. The colour intensity was measured on a microtitre  
189 plate reader at 620 nm. All the assays were repeated five times. The ATPase activity of *NIGr7*  
190 was determined by using the mean value of the samples according to the linear regression of  
191 standards.

#### 192 **Polysaccharide (insoluble)-binding study**

193 To identify the specific carbohydrate-binding conserved aromatic amino acid residues in the  
194 *NIGr7* sequence, *NIGr7* was aligned with known carbohydrate-binding homologs (**Duan et**  
195 **al., 2016**) to create multiple sequence alignments by using ClustalW  
196 (<http://www.genome.jp/tools-bin/clustalw>). Furthermore, *NIGr7* binding to various insoluble  
197 polysaccharides was determined as described by Duan et al (2016). The polysaccharides that

198 were tested were chitin, agarose, Sephadex G-100, raw cassava starch (tapioca starch), alpha-  
199 cellulose, and xylan from corn cobs.

## 200 **Tastant-binding assay**

201 To study the tastant-binding determination with *NIGr7*, the tastant-binding assay with *NIGr7*  
202 was performed in 96-well microtitre plates. Microtitre plates were coated with purified *NIGr7*  
203 protein (100 ng per well, 100  $\mu$ l) and incubated overnight (15-16 h, at 4°C). The unbound  
204 protein was washed off (flicking and flapping manner) thrice with Tris buffer (25 mM Tris,  
205 pH 8.0, 10 mM NaCl). Then, the unbound sites were blocked with 3% bovine albumin serum  
206 in Tris buffer and were incubated for 2 h at 100 rpm at room temperature. An additional 100  
207  $\mu$ l tastants (50, 25, and 12.5 mM) were added into each well and were incubated for 2 h at  
208 room temperature. Then, free tastants were washed off thrice with Tris buffer containing  
209 0.05% Tween-20. Subsequently, the wells were incubated with 100  $\mu$ l biotinylated *NIGr7*  
210 (100 ng), followed by incubation with streptavidin-HRP (1: 2000, 1 h, room temperature).  
211 Finally, the colour was developed. The bound enzyme activity was measured using 100  $\mu$ l  
212 TMB substrate solution (TransGen Biotech Co., LTD, China) containing 0.06% of 30% v/v  
213 hydrogen peroxide (H<sub>2</sub>O<sub>2</sub>) in each well. Due to the enzyme activity, a gradual increase in  
214 brilliant blue colour intensity with the increasing concentration of tastants was observed.  
215 After 20 min, the reaction was stopped by adding 100  $\mu$ l sulfuric acid (0.5 N) to each well. In  
216 this step, the brilliant blue colour suddenly changed to a fine yellow endpoint colour. The  
217 absorbance was measured at 450 nm using an ELISA plate reader.

218

## 219 **Results**

### 220 **Characterization of *NIGr7***

221 The truncated cDNA of *NIGr7* consisted of 730 nucleotide bases coding for 243 amino acids  
222 with a predicted molecular mass of 28.70 kDa (**Fig. S1**). The cDNA clone was designated  
223 *NIGr7* (**Kui et al., 2018**). The estimated pI of the predicted protein *NIGr7* was found to be  
224 9.19. There were eleven polar and nine non-polar amino acid residues. The instability index,  
225 as computed by the ExPASy ProtParam tool, was 36.27, which classified the protein as a  
226 stable protein (**Fig. S1**). Bioinformatics analysis using the TOPCONS tool predicted the  
227 absence of a secretory signal sequence and transmembrane helices in *NIGr7* (**Fig. S2**). *NIGr7*  
228 showed a 20.69-22.62% variation in sequence identity with the known Grs sequence of insect  
229 pests (**Table S1**). Phylogenetic analysis of *NIGr7* revealed the degree of relationship with  
230 respect to genes from other insects (beetle, flies, mosquitos, moths, and butterflies) (**Fig. 1**).  
231 However, this study clearly classified *NIGr7* and other insect taxa into two large clades. We

232 employed the polymerase chain reaction to amplify 730 bp *NIGr7* amplicons. We then  
233 cloned, expressed, and purified the amplified amplicons (data not shown). The apparent  
234 molecular weight of our protein of interest showed a mobility shift of ~55.428 kDa on SDS-  
235 PAGE due to a high (9.19) isoelectric point (pI) and the presence of hydrophobic amino acids  
236 in the *NIGr7* sequence. Furthermore, this purified ~55.428 kDa protein was confirmed to be  
237 *NIGr7* (**Fig. 2A**), which is a sugar transporter of the BPH, based on mass-spectrometry  
238 (LCMS/MS-Q-TOF) (**Fig. S3**).

### 239 **Lectin affinity for *NIGr7***

240 To study the affinity of lectins, which are carbohydrate-binding proteins with *NIGr7*, a total  
241 of fourteen lectins, griffonia (*Bandeiraea*) *simplicifolia* lectin (GSL), *Pisum sativum*  
242 agglutinin (PSA), *Lens culinaris* agglutinin (LCA), *Phaseolus vulgaris* erythroagglutinin  
243 (PHA-E), *Phaseolus vulgaris* leucoagglutinin (PHA-L), *Sophora japonica* agglutinin (SJA),  
244 wheat germ agglutinin (WGA), concanavalin A (ConA), soybean agglutinin (SBA), wheat  
245 germ agglutinin (WGA), *Dolichos biflorus* agglutinin (DBA), *Ulex europaeus* agglutinin 1  
246 (UEA1), *Ricinus communis* agglutinin 1 (RCA1, Ricin), and peanut agglutinin (PNA), were  
247 demonstrated to have affinity for *NIGr7*. DBA revealed the highest affinity, while UEA1  
248 showed the lowest affinity for *NIGr7* (**Fig. 2B**). The standard deviation (SD) of a set of  
249 absorbance values ranged from  $\pm 0.001$  to  $\pm 0.08$  (**Fig. 2B**). These lectins may combine with  
250 *NIGr7* and likely play numerous roles in biological recognition phenomena involving cells,  
251 carbohydrates, and proteins.

### 252 **Lipid affinity for *NIGr7***

253 We screened the arrays of 30 lipids by using the protein-lipid overlay (PLO) assay. This lipid  
254 screen showed that recombinant *NIGr7* binds to several anionic phospholipids, including  
255 PtdIns(3)P, PtdIns(4)P, PtdIns(5)P, PtdIns(3,5)P<sub>2</sub>, PtdIns(4,5)P<sub>2</sub>, PtdIns(3,4,5)P<sub>3</sub>,  
256 phosphatidic acid (PtdOH), phosphatidyl-serine (PtdSer) (**Fig. 2C**) and a single strong signal  
257 of sphingolipid sulfatide (sulfogalactosylceramide; GalCerI3-sulfate) (**Fig. 2D**).

### 258 **Metals affinity to *NIGr7***

259 The metal-binding capability of *NIGr7* was verified by a gel mobility shift assay. The purified  
260 *NIGr7* mixed with different concentrations of CuSO<sub>4</sub> and CaCl<sub>2</sub> was resolved on SDS-PAGE.  
261 Compared with the mobility of *NIGr7* in the presence of 1.0 mM EDTA, the mobility of  
262 *NIGr7* was slowed by the addition of 0.015 to 1.0 mM CuSO<sub>4</sub>. The migration of *NIGr7*  
263 appeared to slow when the concentration of CuSO<sub>4</sub> was high (**Fig. 3A**), which suggested that  
264 *NIGr7* has the ability to bind Cu<sup>2+</sup>. Furthermore, the copper-binding site, as predicted by the  
265 RaptorX-binding server (<http://raptorx.uchicago.edu/BindingSite>), was interesting for the



266 observation of glutamine (Q)-64, asparagine (N)-117, lysine (K)-218, glutamine (Q)-222,  
267 threonine (T)-225, tyrosine (Y)-226, and isoleucine (I)-229 in the *NIGr7* domain (**Fig. 3B**).  
268 The mobility of *NIGr7* shifted with the addition of CaCl<sub>2</sub> in comparison with the mobility of  
269 *NIGr7* in the presence of 1.0 mM EDTA (**Fig. S4**). On SDS-PAGE, the calcium-*NIGr7*  
270 complex was stable in the presence of a low (0.015 and 0.05 mM) CaCl<sub>2</sub> concentration. At  
271 the same time, the calcium-*NIGr7* complex was reduced in the presence of increasing (0.15,  
272 0.5, and 1.0 mM) concentrations of CaCl<sub>2</sub> (**Fig. S4**). This reduced intensity of the calcium-  
273 *NIGr7* complex on SDS-PAGE was due to the precipitation of the *NIGr7* protein in the  
274 presence of a high concentration of calcium chloride under incubation for 30 min at 25°C.

### 275 **Hydrolysis of the *NIGr7*-bound ATP**

276 To understand how the predicted active site of *NIGr7* might relate to its biological function,  
277 we investigated its biochemical activities *in vitro*. A total of 4 phosphorylated sites (serine  
278 (S)-54, tyrosine (Y)-104, tyrosine (Y)-105, and threonine (T)-201) and their corresponding  
279 catalytic protein kinases were predicted from the *NIGr7* amino acid (1-243) sequence  
280 (<http://kinasePhos.mbc.nctu.edu.tw/>, **Fig. S5**). Furthermore, the developed phosphate  
281 standard curve showed that phosphate could be detected at a minimum of 500 pmol and  
282 maximum of 2000 pmol. The R<sup>2</sup> value was 0.992, as shown in the figure (**Fig. 3C, Table**  
283 **S2A**). Examination of the ATPase activity assay of bound phosphate in *NIGr7* showed that  
284 217.68-1125.85 pmol of phosphate was liberated (**Fig. 3D, Table S2B**), and its respective  
285 stable dark green colour with free phosphate liberated by the enzyme in a colorimetric  
286 product is shown in the figure (**Fig. 3E**). The R<sup>2</sup> value was 0.994, as shown in the figure (**Fig.**  
287 **3D**). These data are consistent with the finding that *NIGr7* displays its ATPase activity *in*  
288 *vitro*. We postulated that phosphate binding plays an important biochemical function.

### 289 ***NIGr7* exhibited polysaccharide (insoluble) specificity**

290 The purified *NIGr7* showed a binding affinity for six insoluble polysaccharides. *NIGr7*  
291 showed the highest affinity for tapioca starch, while *NIGr7* showed the lowest affinity for  
292 Sephadex G-100 (**Fig. 4A**). Furthermore, seven carbohydrate-binding homologs sequences  
293 (**Duan et al., 2016**), belonging to accession numbers ADR64668-2, AFN57700-2, CBM<sub>C5614</sub>-  
294 1, ADR64664, ADR64668-1, AFN57700-1, and CAJ19146, were aligned with *NIGr7* to  
295 observe conserved aromatic amino acids, which were accepted to play an essential role in  
296 identifying and binding to polysaccharides. Two (Tryptophan (W)-59, and W-128) aromatic  
297 amino acids were identified as being completely conserved in all the aligned-sequences  
298 (numbered according to amino acids in *NIGr7*) (**Fig. 4B, Red box**). At the same time,  
299 phenylalanine (F)-91, tyrosine (Y)-104, F-108, and F-111 were observed to be partially

300 conserved aromatic amino acids in all the aligned sequences (**Fig. 4B**, Pink box). A  
301 phylogenetic tree revealed that *NIGr7* showed the least similarity with other known  
302 carbohydrate-binding homolog sequences (**Fig. 4C**).

### 303 ***NIGr7* showed an interaction with various tastants**

304 Twelve tastants (D-(+) glucose, maltose, sucrose, D-(+) galactose, D-xylose, trehalose, D-(-)  
305 ribose, D-(-) melezitose, maltotriose, D-sorbitol, D-cellobiose, and myoinositol) were  
306 individually analysed, and all showed binding affinity for *NIGr7* (**Fig. 5**). The binding  
307 affinities of the tastant preparations at each of the 3 concentrations of 50, 25, and 12.5 mM  
308 are depicted in Figure 5. Among the tastants, 50 mM D-cellobiose showed the highest  
309 (absorbance 0.352) binding affinity for *NIGr7* (**Fig. 5K**), while 50 mM sorbitol showed the  
310 lowest (absorbance 0.065) binding affinity for *NIGr7* (**Fig. 5J**). The standard deviation (SD)  
311 of a set of absorbance values ranged from  $\pm 0.0005$  to  $\pm 0.042$  (**Fig. 5**).

312

### 313 **Discussion**

314 Here, we systematically characterized the functional properties of *NIGr7* using the  
315 macromolecular (*in vitro*) approach. Our study begins to overcome challenges in studying  
316 this highly divergent superfamily of insect Gr proteins and provides a systematic overview of  
317 ligand (metals, carbohydrates, lipids, lectins, and tastants) detection and ATP binding by this  
318 sugar receptor. The majority of gustatory receptor ligands in *Drosophila* have been studied by  
319 using electrophysiology recordings and/or behavioural investigations. However, there is, to  
320 some extent, a gap in the accurate interpretations of the electro-physiological data and  
321 behaviours that are recorded between wild-type and Gr mutant flies (**Miyamoto et al., 2013**).  
322 The lectin-binding proteins of the rice brown planthopper are still undefined. Primary  
323 information from the BPH gustatory receptor and the lectin(s)-binding study reveals that the  
324 structure that interacts with the lectin(s) consists of carbohydrate moieties (**Lis and Sharon,**  
325 **1986**). A variety of carbohydrate specificity-lectin(s) were selected for study (**Fig. 2B**). In  
326 assays, the *NIGr7* protein interacted with a variety of sugar-specific lectins, which offers a  
327 complex oligosaccharide structure. Similar facts were found earlier for the human parotid  
328 salivary gland (**Rohringer and Holden, 1985**). The role that lectin-binding with *NIGr7*  
329 (protein) plays in the developmental stages of the BPH has yet to be determined.

330 Although phospholipids (PLs) are only a minor nutrient compared to starch and protein, they  
331 may have both nutritional and functional significance. Phosphatidylcholine (PC),  
332 phosphatidylethanolamine (PE), phosphatidylinositol (PI) and their lyso forms are the major  
333 PLs in rice. Two PLs, PtdIns4P (phosphatidylinositol monophosphate) and PtdIns(4,5)P2

334 (phosphatidylinositol bisphosphate), have been reported as key intermediate sources of  
335 second messengers, and they directly affect the signal pathways in many animal cells and  
336 plants cells (**Chen et al., 1991**). In this study, *NIGr7* binds to various lipids with different  
337 affinities and specificities (**Fig. 2C, D**), which could be the result of non-specific electrostatic  
338 interactions. The noticed affinities of *NIGr7* for the lipids are specifically known as PH  
339 (pleckstrin homology) lipid-binding domains (**Stahelin, 2009**). However, various examples in  
340 prior studies show that low-affinity interactions have a distinct and influential impact on  
341 biological roles (**Becker et al., 1996; Irwin and Tan, 2014; Wilson, 2003**). Our rationale,  
342 which can be noticed in *NIGr7*-lipid interactions and in the lipids with their reported  
343 biological functions, reveals that lipid binding targets the chaperone proteins to specific  
344 cellular locations, where, in addition to participating in transmembrane targeting and protein  
345 folding, they also affect the physiological pathway of the membrane. Hence, the specific  
346 binding of lipids suggests that lipid binding has been a conserved function of *NIGr7* since its  
347 appearance (**Fig. 2C, D**).

348 Copper is an important micronutrient that plays an essential role in plant growth and  
349 development (**Roy, 1931**); little is known about copper in insects. Insects often consume  
350 heavy metal ions from their niche. Previous reports revealed that copper is related to both the  
351 developmental stage of the organism, when animals undergo the transition from larval to  
352 adult blood types (**Durstewitz and Terwilliger, 1997; Ye et al., 2015; Li et al., 2016**), and  
353 the moulting cycle, when large fluctuations in protein synthesis take place (**Ye et al., 2015;**  
354 **Li et al., 2016**). In the present study, *NIGr7* showed an interaction with copper. Therefore,  
355 taking this observation further, we speculate that copper may also play a role in the  
356 developmental stage (egg to adult) and moulting cycle of BPH. However, this has yet to be  
357 verified.

358 It has been noted that effectors from herbivores, which can bind to  $\text{Ca}^{2+}$ , are involved in  
359 suppressing the plant's defence (**Atamian et al., 2013**) and contracting forisomes (**Will et al.,**  
360 **2007**). However, the physiological mechanism of effector-mediated regulation of plant  
361 defences remains widely unexplained (**Consaes et al., 2012**). The structure of the  
362 transduction pathway in gustation is unclear. The signalling pathways, including cGMP  
363 (**Amakawa et al., 1990**), inositol 1,4,5-triphosphate ( $\text{IP}_3$ ) (**Koganezawa and Shimada,**  
364 **2002**), and the sugar-receptor protein-gated channel (**Murakami and Kijima, 2000**), have  
365 been studied in few insects. Furthermore, GPCRs activate a temporal rise in intracellular  $\text{Ca}^{2+}$   
366 because inositol 1,4,5-triphosphate activates delivery of  $\text{Ca}^{2+}$  from intracellular storage  
367 (**Torfs et al., 2002**). Therefore, we speculate that the GPCRs- $\text{IP}_3$ - $\text{Ca}^{2+}$ -mediated network may

368 impact the regulation of ligand-mediated calcium flux in the BPH physiological mechanism,  
369 but this has yet to be elucidated.

370 Polysaccharides display a wide range of solubility in water. However, some are  
371 water insoluble, e.g., chitin, agarose, tapioca starch, alpha cellulose, and xylan. Cellulose and  
372 chitin polysaccharides play structural roles in plants, fungi, and insects. The interactions  
373 between proteins and cellulose (**Georgelis et al., 2012; Boraston et al., 2004; Boraston,**  
374 **2004**), as well as between human chitin-binding proteins (YKL-39 and -40) (**Schimpl et al.,**  
375 **2012**), have been studied extensively. However, the physiological role of these proteins  
376 remains poorly understood. Our results revealed a new carbohydrate-binding protein, *NI*Gr7,  
377 which targets different insoluble polysaccharides that adopt varied conformations, including  
378 chitin, agarose, tapioca starch, alpha cellulose, and xylan. This study reveals that *NI*Gr7 may  
379 possess higher plasticity to accommodate varied ligand conformations. This varied binding  
380 specificity remains unexplored without a structural study of the *NI*Gr7-ligand complex, and it  
381 has yet to be a priority in future studies.

382 To study *NI*Gr7 as a sugar Gr, we tested three different concentrations of twelve sugars to  
383 reveal the receptor's ligands. The results revealed that all 12 sugars interacted with *NI*Gr7  
384 (**Fig. 5**). A previous report demonstrated that galactose, xylose, glucose, and trehalose can  
385 regulate intracellular  $Ca^{2+}$  levels in insect cell lines (**Chen et al., 2019; Xu et al., 2012**). We  
386 speculate that expression of *NI*Gr7 within the BPH may regulate the expression, localization,  
387 and/or function of the endogenous taste receptors of the BPH, thus leading to an increase or  
388 decrease in the responses to tastants.

### 389 **Conclusions**

390 Currently, there is insufficient knowledge about the function of gustatory (sugar) receptors  
391 within the insect. In a previous study in *Drosophila*, Gr43a showed upregulation during the  
392 feeding experiences of hungry flies and downregulation during feeding experiences in  
393 satiated flies (**Miyamoto et al., 2012**). In the present study, we observed the functional  
394 versatility of *NI*Gr7. We assume that *NI*Gr7 binding with its ligands may likely stimulate the  
395 physiological pathways of the BPH for feeding behaviour and adaptation. These observations  
396 extended our knowledge of the Grs (proteins) mechanism in insect and pest control.

397

### 398 **Author contributions**

399 WZ and AO conceived and designed the experiments. AO performed the experiments and  
400 analyzed the data. AO and WZ wrote the manuscript. Both authors have read and approved  
401 the final manuscript.

402 **Acknowledgements**

403 We thank Longgyu Yuan for their assistance with insect maintaining in green house at State  
404 Key Laboratory of Biocontrol, SunYat-sen University, China.

405 **Competing interests**

406 The authors declared that they have no competing or financial interest.

407 **Funding**

408 This work was funded by the National Natural Science Foundation of China (U1401212) to  
409 WZ. AO thanks the State Key Laboratory of Biocontrol visiting scholar foundation for a  
410 research grant (SKLBC15F02), SunYat-sen University, China.

411

412 **References**

- 413 1. Amakawa, T., Ozaki, M. and Kawata, K. (1990). Effects of cyclic GMP on the sugar  
414 taste recepStor cell of the fly *Phormia regina*. *J. Insect Physiol.* **36**, 281–286.
- 415 2. Amrein, H. and Thorne, N. (2005). Gustatory perception and behavior in *Drosophila*  
416 *melanogaster*. *Curr. Biol.* **15**(17), R673-684.
- 417 3. Atamian, H. S., Chaudhary, R., Cin, V. D., Bao, E., Girke, T. and Kaloshian, I. (2013). In  
418 planta expression or delivery of potato aphid *Macrosiphum euphorbiae* effectors Me10  
419 and Me23 enhances aphid fecundity. *Mol. Plant Microbe Interact.* **26**(1), 67-74.
- 420 4. Becker, T. C., Noel, R. J., Johnson, J. H., Lynch, R. M., Hirose, H., Tokuyama, Y., Bell,  
421 G. I. and Newgard, C. B. (1996). Differential effects of overexpressed glucokinase and  
422 hexokinase I in isolated islets. Evidence for functional segregation of the high and low  
423 Km enzymes. *J. Biol. Chem.* **271**(1), 390-394.
- 424 5. Benton, R., Sachse, S., Michnick, S. W. and Vosshall, L. B. (2006). Atypical membrane  
425 topology and heteromeric function of *Drosophila* odorant receptors in vivo. *PLoS Biol.*  
426 **4**(2), e20.
- 427 6. Boraston, A. B. (2005). The interaction of carbohydrate-binding modules with insoluble  
428 non-crystalline cellulose is enthalpically driven. *Biochem. J.* **385**(Pt2), 479-484.
- 429 7. Boraston, A. B., Bolam, D. N., Gilbert, H. J. and Davies, G. J. (2004). Carbohydrate-  
430 binding modules: fine-tuning polysaccharide recognition. *Biochem. J.* **382**(Pt3), 769-781.

- 431 8. Chen, Q., Brglez, I. and Boss, W. F. (1991). Inositol phospholipids as plant second  
432 messengers. *Symp. Soc. Exp. Biol.* **45**, 159-175.
- 433 9. Chen, W. W., Kang, K., Yang, P. and Zhang, W. Q. (2019). Identification of a sugar  
434 gustatory receptor and its effect on fecundity of the brown planthopper *Nilaparvata*  
435 *lugens*. *Insect Sci.* **26**(3), 441-452.
- 436 10. Clyne, P. J., Warr, C. G. and Carlson, J. R. (2000). Candidate taste receptors in  
437 *Drosophila*. *Science* **287**(5459), 1830-1834.
- 438 11. Consales, F., Schweizer, F., Erb, M., Gouhier-Darimont, C., Bodenhausen, N.,  
439 Bruessow, F., Sobhy, I. and Reymond, P. (2012). Insect oral secretions suppress wound-  
440 induced responses in *Arabidopsis*. *J. Exp. Bot.* **63**(2), 727-737.
- 441 12. Dahanukar, A., Foster, K., van der Goes van Naters, W. M. and Carlson, J. R. (2001). A  
442 Gr receptor is required for response to the sugar trehalose in taste neurons of *Drosophila*.  
443 *Nat. Neurosci.* **4**(12), 1182-1186.
- 444 13. Dahanukar, A., Lei, Y. T., Kwon, J. Y. and Carlson, J. R. (2007). Two Gr genes underlie  
445 sugar reception in *Drosophila*. *Neuron* **56**(3), 503-516.
- 446 14. Duan, C. J., Feng, Y. L., Cao, Q. L., Huang, M. Y. and Feng, J. X. (2016). Identification  
447 of a novel family of carbohydrate-binding modules with broad ligand specificity. *Sci.*  
448 *Rep.* **6**, 19392.
- 449 15. Dunipace, L., Meister, S., McNealy, C. and Amrein, H. (2001). Spatially restricted  
450 expression of candidate taste receptors in the *Drosophila* gustatory system. *Curr. Biol.*  
451 **11**(11), 822-835.
- 452 16. Durstewitz, G. and Terwilliger, N. B. (1997). Developmental changes in hemocyanin  
453 expression in the Dungeness crab, *Cancer magister*. *J. Biol. Chem.* **272**(7), 4347-4350.
- 454 17. Gardiner, A., Barker, D., Butlin, R. K., Jordan, W. C. and Ritchie, M. G. (2008).  
455 Evolution of a complex locus: exon gain, loss and divergence at the Gr39a locus in  
456 *Drosophila*. *PLoS One* **3**(1), e1513.
- 457 18. Georgelis, N., Yennawar, N. H. and Cosgrove, D. J. (2012). Structural basis for entropy-  
458 driven cellulose binding by a type-A cellulose-binding module (CBM) and bacterial  
459 expansin. *Proc. Natl. Acad. Sci. U.S.A.* **109**(37), 14830-14835.

- 460 19. Hill, C. A., Fox, A. N., Pitts, R. J., Kent, L. B., Tan, P. L., Chrystal, M. A., Cravchik, A.,  
461 Collin, F. H., Robertson, H. M. and Zwiebel, L. J. (2002). G protein coupled receptors  
462 in *Anopheles gambiae*. *Science* **298**(5591), 176-178.
- 463 20. Irwin, D. M. and Tan, H. (2014). Evolution of glucose utilization: glucokinase and  
464 glucokinase regulator protein. *Mol. Phylogenet. Evol.* **70**, 195-203.
- 465 21. Kent, L. B., Walden, K. K. and Robertson, H. M. (2008). The gr family of candidate  
466 gustatory and olfactory receptors in the yellow-fever mosquito *Aedes aegypti*. *Chem.*  
467 *Senses* **33**(1), 79-93.
- 468 22. Koganezawa, M. and Shimada, I. (2002). Inositol 1,4,5-trisphosphate transduction  
469 cascade in taste reception of the fleshfly, *Boettcherisca peregrina*. *J. Neurobiol.* **51**, 66-  
470 83.
- 471 23. Kang, K., Yang, P., Chen, L. E., Pang, R., Yu, L. J., Zhou, W. W., Zhu, Z. R. and Zhang,  
472 W. Q. (2018). Identification of putative fecundity-related gustatory receptor genes in the  
473 brown planthopper *Nilaparvata lugens*. *BMC Genomics* **19**(1): 970.
- 474 24. Lee, Y., Moon, S. J. and Montell, C. (2009). Multiple gustatory receptors required for the  
475 caffeine response in *Drosophila*. *Proc. Natl. Acad. Sci. U.S.A.* **106**(11), 4495-4500.
- 476 25. Li, Z., An, X. K., Liu, Y. D. and Hou, M. L. (2016). Transcriptomic and expression  
477 analysis of the salivary glands in white-backed planthoppers, *Sogatella furcifera*. *PLoS*  
478 *One* **11**(7), e0159393.
- 479 26. Lis, H. and Sharon, N. (1986). Lectins as molecules and as tools. *Annu. Rev. Biochem.*  
480 **55**, 35-67.
- 481 27. Miyamoto, T., Chen, Y. and Slone, J. (2013). Identification of a *Drosophila* glucose  
482 receptor using Ca<sup>2+</sup> imaging of single chemosensory neurons. *PLoS ONE* **8**(2), e56304.
- 483 28. Miyamoto, T., Slone, J., Song, X. and Amrein, H. (2012). A fructose receptor functions  
484 as a nutrient sensor in the *Drosophila* brain. *Cell* **151**(5), 1113-1125.
- 485 29. Murakami, M. and Kijima, H. (2000). Transduction ion channels directly gated by sugars  
486 on the insect taste cell. *J. Gen. Physiol.* **115**, 455-466.

- 487 30. Ojha, A., Sree, K. S., Sachdev, B., Rashmi, M. A., Ravi, K. C., Suresh, P. J., Mohan, K.  
488 S. and Bhatnagar, R. K. (2014). Analysis of resistance to Cry1Ac in field-collected pink  
489 bollworm, *Pectinophora gossypiella* (Lepidoptera: Gelechiidae), populations. *GM Crops*  
490 *Food* **5**(4), 280-286.
- 491 31. Ojha, A. and Zhang, W. Q. (2019). A comparative study of microbial community and  
492 dynamics of *Asaia* in the brown planthopper from susceptible and resistant rice varieties.  
493 *BMC Microbiol.* **19**(1), 139.
- 494 32. Robertson, H. M., Warr, C. G. and Carlson, J. R. (2003). Molecular evolution of the  
495 insect chemoreceptor gene superfamily in *Drosophila melanogaster*. *Proc. Natl. Acad.*  
496 *Sci. U.S.A.* **100**(Suppl 2), 14537-14542.
- 497 33. Robertson, H. M. and Wanner, K. W. (2006). The chemoreceptor superfamily in the  
498 honey bee, *Apis mellifera*: expansion of the odorant, but not gustatory, receptor family.  
499 *Genome Res.* **16**(11), 1395-1403.
- 500 34. Rohringer, R and Holden, D. W. (1985). Protein blotting: detection of proteins with  
501 colloidal gold, and of glycoproteins and lectins with biotin-conjugated and enzyme  
502 probes. *Anal. Biochem.* **144**(1), 118-127.
- 503 35. Roy, M. (1931). A quantitative study of copper in insects. *Annals of the Entomological*  
504 *Society of America* **24**(3), 485-488.
- 505 36. Schimpl, M., Rush, C. L., Betou, M., Eggleston, I. M., Recklies A. D. and van Aalten, D.  
506 M. (2012). Human YKL-39 is a pseudo-chitinase with retained chitooligosaccharide-  
507 binding properties. *Biochem. J.* **446**(1), 149-57.
- 508 37. Shankar, S., Chua, J. Y., Tan, K. J., Calvert, M. E., Weng, R., Ng, W. C., Mori, K. and  
509 Yew, J. Y. (2015). The neuropeptide tachykinin is essential for pheromone detection in  
510 a gustatory neural circuit. *Elife* **4**, e06914.
- 511 38. Slone, J., Daniels, J. and Amrein, H. (2007). Sugar receptors in *Drosophila*. *Curr. Biol.*  
512 **17**(20), 1809-1816.
- 513 39. Smadja, C., Shi, P., Butlin, R. K. and Robertson, H. M. (2009). Large gene family  
514 expansions and adaptive evolution for odorant and gustatory receptors in the pea aphid,  
515 *Acyrtosiphon pisum*. *Mol. Biol. Evol.* **26**(9), 2073-2086.



- 516 40. Stahelin, R. V. (2009). Lipid binding domains: more than simple lipid effectors. *J. Lipid*  
517 *Res.* **50**(Suppl), S299-S304.
- 518 41. Torfs, H., Poels, J., Detheux, M., Dupriez, V., Van Loy, T., Vercammen, L., Vassart, G.,  
519 Parmentier, M. and Vanden Broeck, J. (2002). Recombinant aequorin as a reporter for  
520 receptor-mediated changes of intracellular Ca<sup>2+</sup>-levels in *Drosophila* S2 cells. *Invert.*  
521 *Neurosci.* **4**,119-124.
- 522 42. Tribolium Genome Sequencing Consortium, Richards, S., Gibbs, R. A., Weinstock, G.  
523 M., Brown, S. J., Denell, R., Beeman, R. W., Gibbs, R., Beeman, R. W., Brown, S. J. et  
524 al. (2008). The genome of the model beetle and pest *Tribolium castaneum*. *Nature*  
525 **452**(7190), 949-955.
- 526 43. Wanner, K. W. and Robertson, H. M. (2008). The gustatory receptor family in the  
527 silkworm moth *Bombyx mori* is characterized by a large expansion of a single lineage of  
528 putative bitter receptors. *Insect Mol. Biol.* **17**(6), 621-629.
- 529 44. Weiss, L. A., Dahanukar, A., Kwon, J. Y., Banerjee, D. and Carlson, J. R. (2011). The  
530 molecular and cellular basis of bitter taste in *Drosophila*. *Neuron* **69**(2), 258-272.
- 531 45. Will, T., Tjallingii, W. F., Thönnessen, A. and van Bel, A. J. (2007).  
532 Molecular sabotage of plant defense by aphid saliva. *Proc. Natl. Acad. Sci. U.S.A.*  
533 **104**(25), 10536-10541.
- 534 46. Wilson, J. E. (2003). Isozymes of mammalian hexokinase: structure, subcellular  
535 localization and metabolic function. *J. Exp. Biol.* **206**(Pt12), 2049-2057.
- 536 47. Xu, W., Papanicolaou, A., Zhang, H. J. and Anderson, A. (2016). Expansion of a bitter  
537 taste receptor family in a polyphagous insect herbivore. *Sci. Rep.* **6**, 23666.
- 538 48. Xu, W. and Anderson, A. (2015). Carbon dioxide receptor genes in cotton bollworm  
539 *Helicoverpa armigera*. *Naturwissenschaften* **102**(3-4), 11.
- 540 49. Xu, W., Zhang, H. J. and Anderson, A. (2012). A sugar gustatory receptor identified  
541 from the foregut of cotton bollworm *Helicoverpa armigera*. *J. Chem. Ecol.* **38**(12), 1513-  
542 1520.
- 543 50. Xue, J., Zhou, X., Zhang, C. X., Yu, L. L., Fan, H. W., Wang, Z., Xu, H. J., Xi, Y., Zhu,  
544 Z. R. and Zhou, Z. R. (2014). Genomes of the rice pest brown planthopper and its

545 endosymbionts reveal complex complementary contributions for host adaptation.  
546 Genome Biol. **15**(12), 521.

547 51. Ye, Y. X., Pan, P. L., Kang, D., Lu, J. B. and Zhang, C. X. (2015). The multicopper  
548 oxidase gene family in the brown planthopper, *Nilaparvata lugens*. Insect Biochem. Mol.  
549 Biol. **63**, 124-132.

550 52. Zhang, H. J., Anderson, A. R., Trowell, S. C., Luo, A. R., Xiang, Z. H. and Xia, Q. Y.  
551 (2011). Topological and functional characterization of an insect gustatory receptor. PLoS  
552 One **6**(8), e24111.

### 553 **Figure legends**

554 **Figure 1**| Phylogenetic tree showing the relation between orthologues of gustatory receptor  
555 reported from different organisms.

556 **Figure 2**| *NIGr7* recombinant protein and *NIGr7*-ligands overlay assays. (A) Purified *NIGr7*,  
557 (B) *NIGr7*-lectin overlay assay shows that *NIGr7* binds to several lectins. Protein-lipid  
558 overlay assay shows that *NIGr7* binds to several anionic lipids. (C) *NIGr7* reveals interaction  
559 to phospholipids, and (D) interaction to sphingolipids.

560 **Figure 3**| Overview of the *NIGr7*-copper complex and ATPase/GTPase activity assay for  
561 *NIGr7*. (A) The gel mobility shifts of the *NIGr7*-copper complex showed a varied range of  
562 copper. (B) Predicted binding amino acid residues Q64, N117, K218, Q222, T225, Y226, and  
563 I229 anchor copper within the *NIGr7*. (C) Standard curve prepared according to the  
564 ATPase/GTPase activity kit instructions. (D) The *NIGr7* (6.25, 12.5, 25, 50, or 100  $\mu$ g)  
565 determined ATP. (E) This ATPase/GTPase activity assay is a colorimetric test that shows the  
566 amount of free inorganic phosphate (Pi). Controls that included no *NIGr7* were measured to  
567 observe for spontaneous ATP hydrolysis of ATP, and their optical density (OD) values were  
568 deducted from the samples' values.

569 **Figure 4**| Characterization of *NIGr7* as a novel carbohydrate protein. (A) Binding of *NIGr7* to  
570 insoluble polysaccharides. Thirty micrograms of purified *NIGr7* was incubated with 200  $\mu$ l  
571 4% (wt/vol) insoluble polysaccharide including chitin, agarose, Sephadex G-100, raw cassava  
572 starch (tapioca starch), alpha-cellulose, or xylan from corn cobs. The same amount of protein  
573 used in the binding assay but without polysaccharide was included as a control (CK). (B)  
574 Multiple sequence alignment of *NIGr7* and selected carbohydrate-binding homologs. The

575 sequence similarity and identity are shown by dots and asterisks, respectively. Entirely  
576 conserved aromatic (tryptophan (W)-59, and W-128) amino acids are red, and partly  
577 conserved aromatic (phenylalanine (F)-91, tyrosine (Y)-104, F-108, and F-111 ) amino acids  
578 are pink. (C) Phylogenetic tree showing the relation between orthologues of the carbohydrate  
579 protein that was reported previously.

580 **Figure 5** | Tastants screening assay. The binding of *NIGr7* to different concentrations (50, 25,  
581 and 12.5 mM) of tastants. (A) D-(+) glucose, (B) maltose, (C) sucrose, (D) D(+) galactose,  
582 (E) D-xylose, (F) trehalose, (G) D-(-) ribose, (H) D-(-) melezitose, (I) maltotriose, (J) D-  
583 sorbitol, (K) D-cellobiose, and (L) myoinositol.

#### 584 **Supplementary materials**

585 **Figure S1.** The computation of various physical and chemical parameters of *NIGr7*.

586 **Figure S2.** Consensus prediction of membrane protein topology using the TOPCONS server  
587 indicated no trans-membrane helices (blue in the graph) in the predicted amino acid sequence  
588 of *NIGr7*. TOPCONS predicted the topology of *NIGr7* from five different topology prediction  
589 algorithms: OCTOPUS, Philius, PolyPhobius, SCAMPI (multiple sequence mode), and  
590 SPOCTOPUS. The output of these five algorithms was used as input for the TOPCONS  
591 Hidden Markov Model (HMM) (shown in maroon), which provided a consensus prediction  
592 for the protein together with a reliability score based on the agreement of the included  
593 methods across the sequence. In addition, ZPRED was used to predict the Z-coordinate (i.e.,  
594 the distance to the membrane centre) of each amino acid, and the G-scale was used to predict  
595 the free energy of the membrane insertion for a window of 19 amino acids that were centred  
596 around each position in the sequence.

597 **Figure S3.** LCMS/MS-Q-TOF-based identification of the *NIGr7*. (A) Parameters used in  
598 MASCOT search, (B and C) The green area is a significant threshold. This area of the score  
599 over the results of the identification of the mascot positive results, (D and E) decoy search  
600 summary, and (F) cross-examination of the LCMS/MS-QTOF-generated peptide sequence of  
601 the sugar transporter sequence blast in the NCBI protein database.

602 **Figure S4.** An electrophoretic mobility shift assay (EMSA) for the calcium-binding assay.

603 **Figure S5.** Computationally predicted catalytic kinase-specific phosphorylation sites within  
604 the *NIGr7* sequence using the KinasePhos tool.

605 **Table S1.** *NlGr7* protein sequence identity with known chemoreceptors of insects.

606 **Table S2.** ATPase activity assay with *NlGr7*. Hydrolysis of the *NlGr7*-bound ATP. (A)  
607 Standard curve of phosphate, (B) the concentration of released phosphate from the *NlGr7*-  
608 bound ATP. The released concentration of phosphate from the samples per well was  
609 calculated using the phosphate standard curve value 500 pmol.

Figure 1

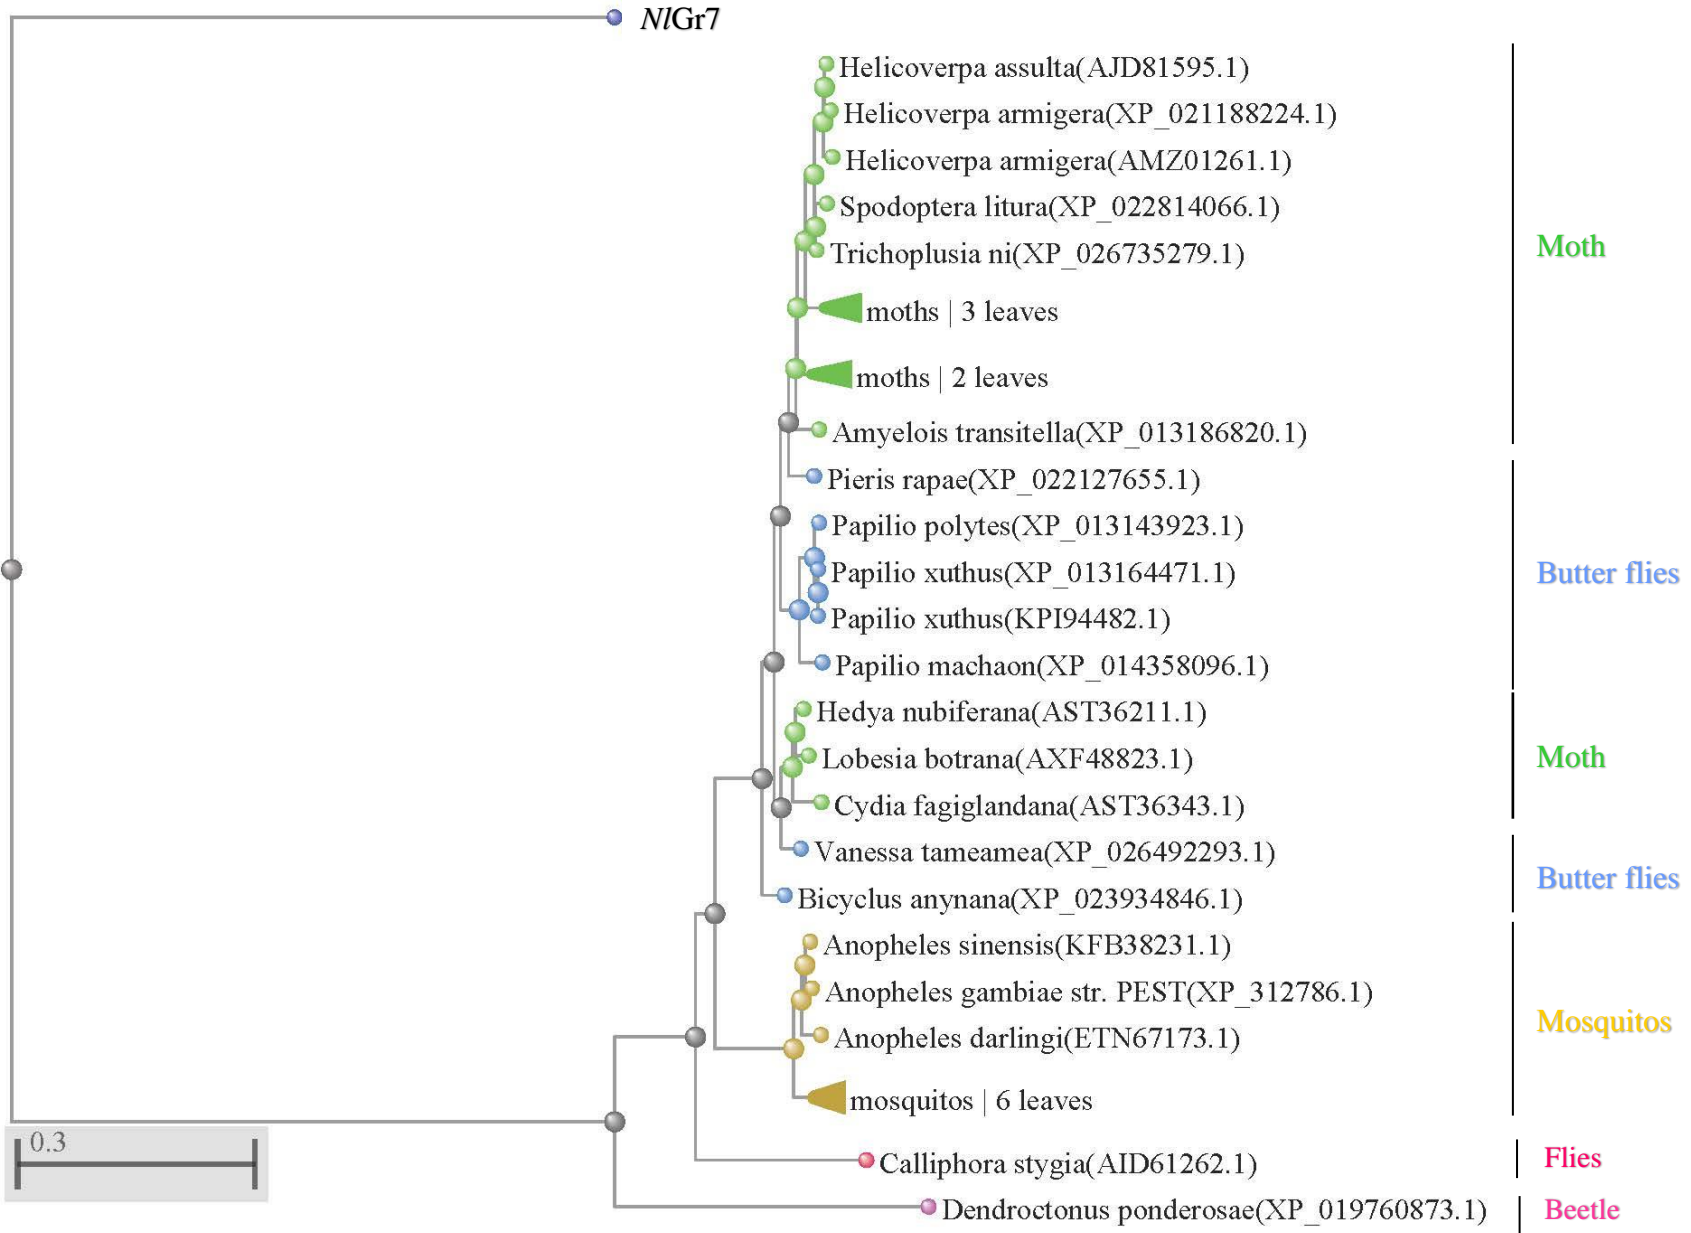

Figure 2

A

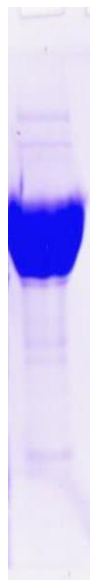

B

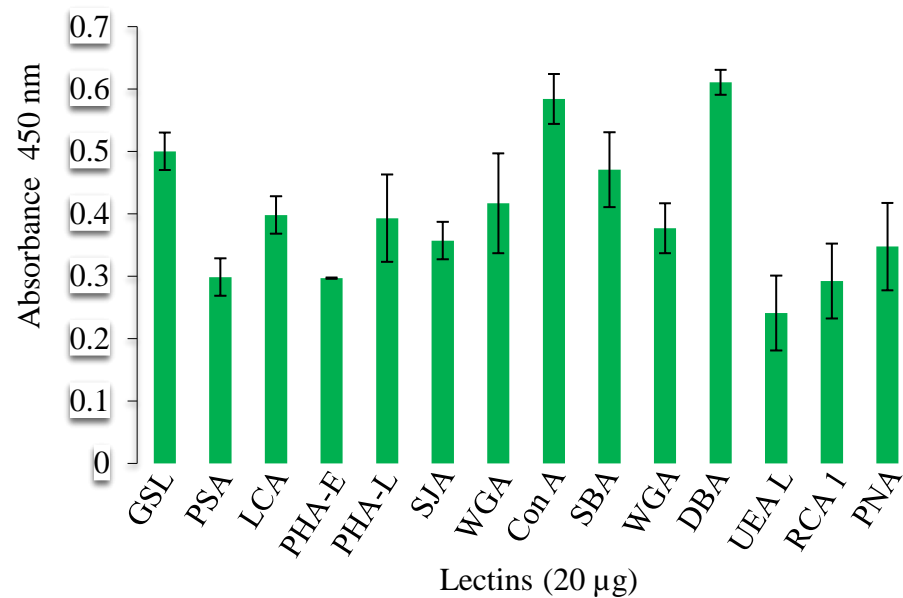

C

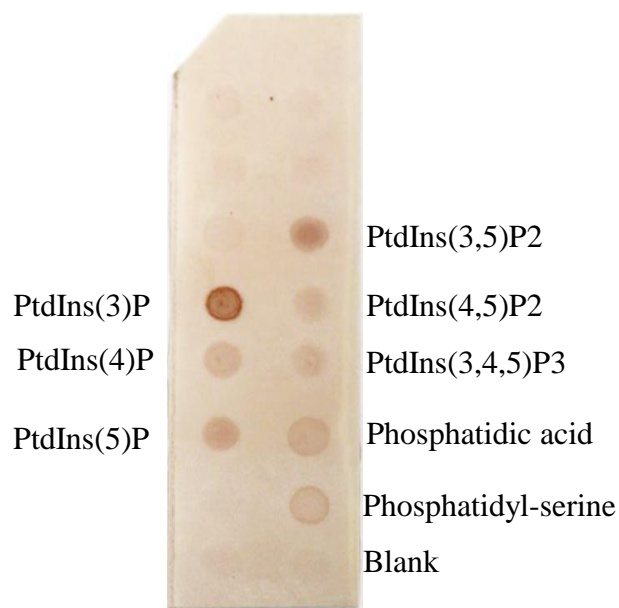

D

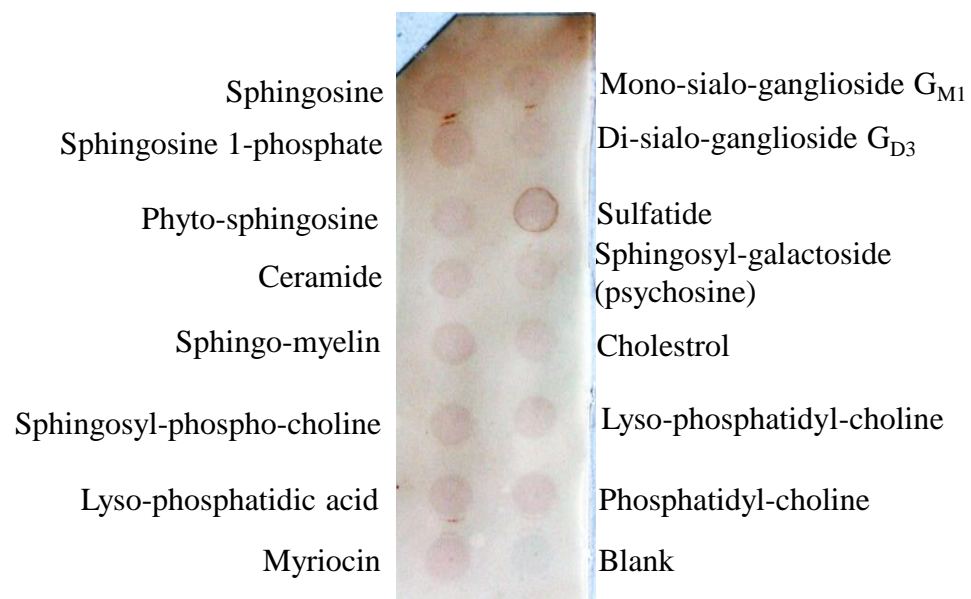

Figure 3

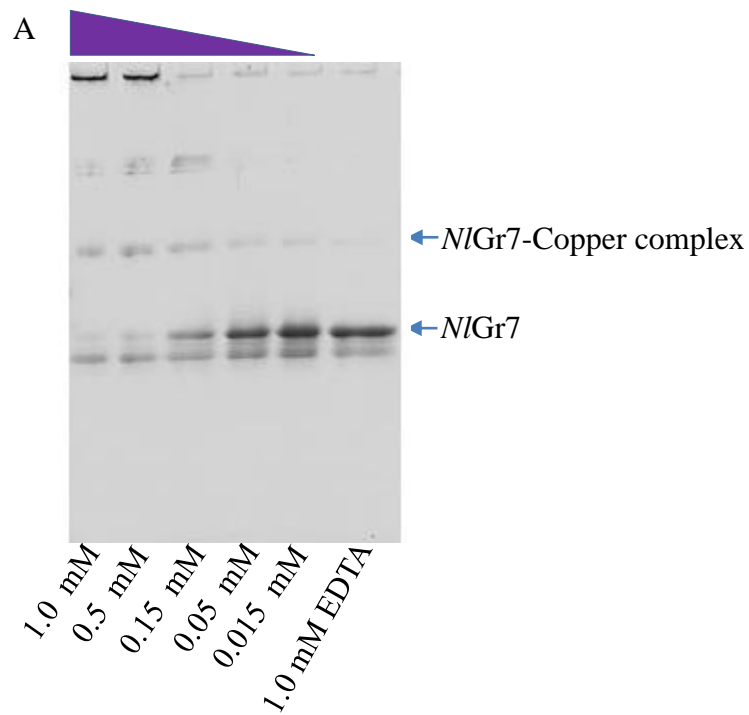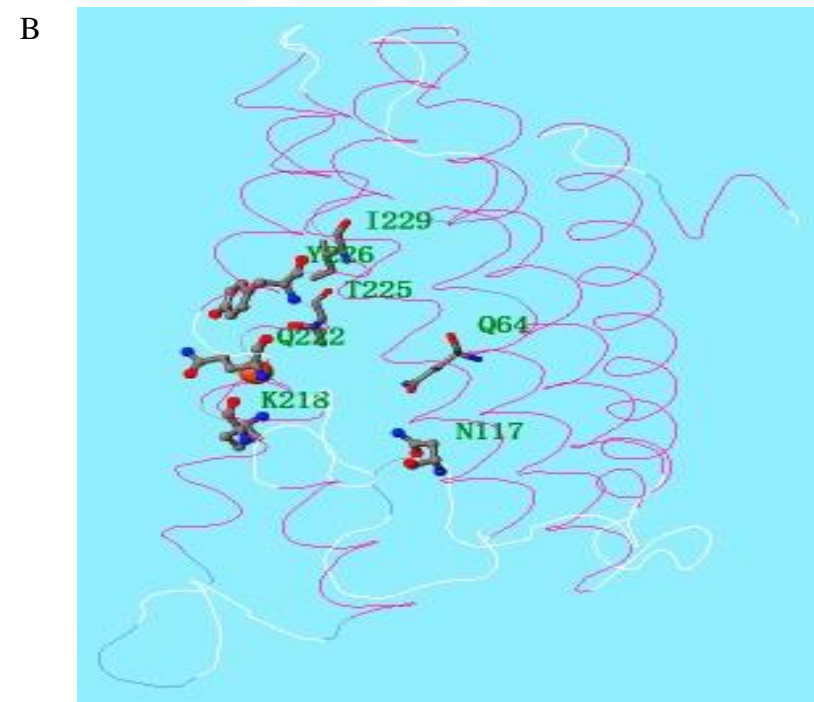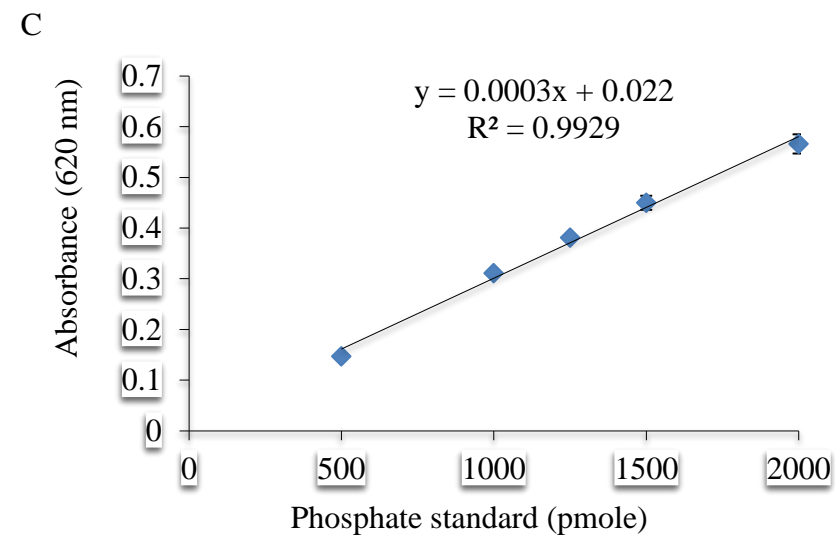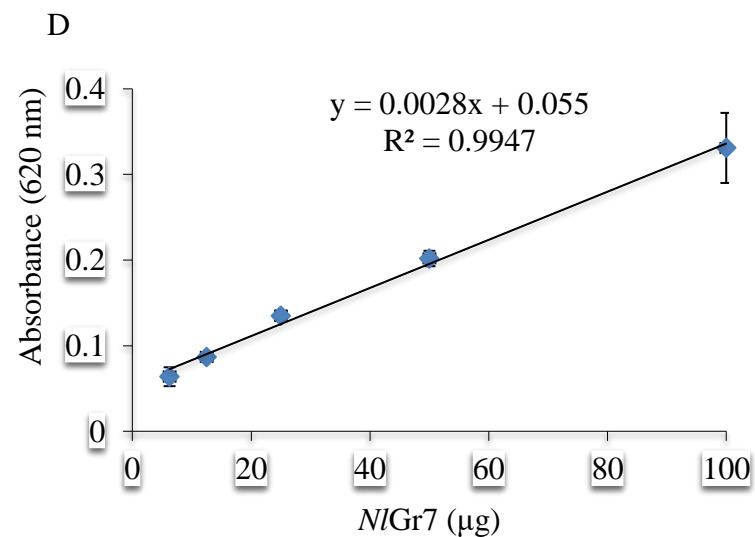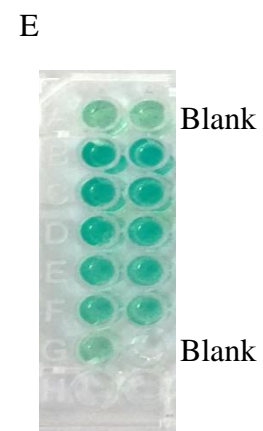

Figure 4

A

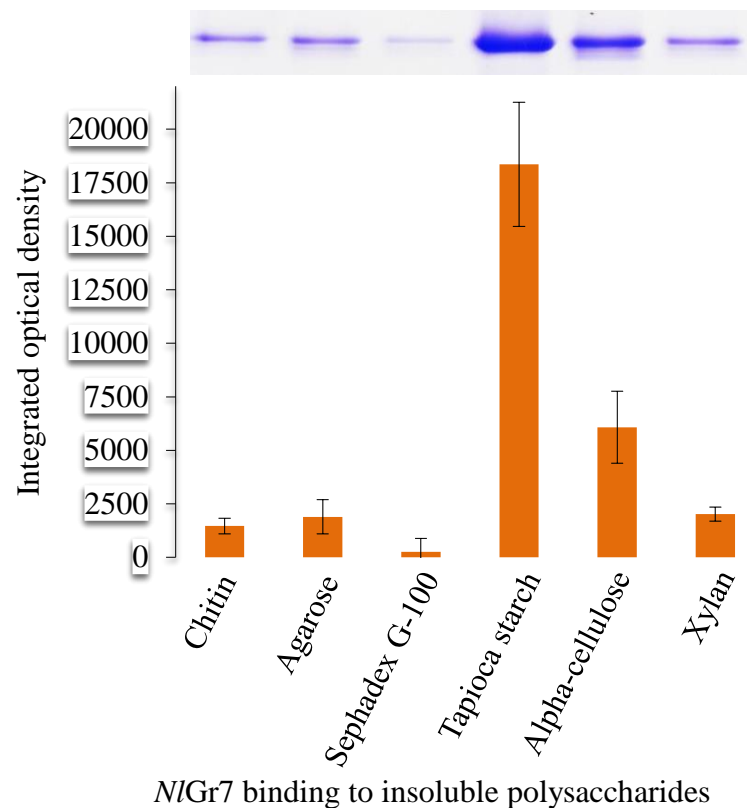

C

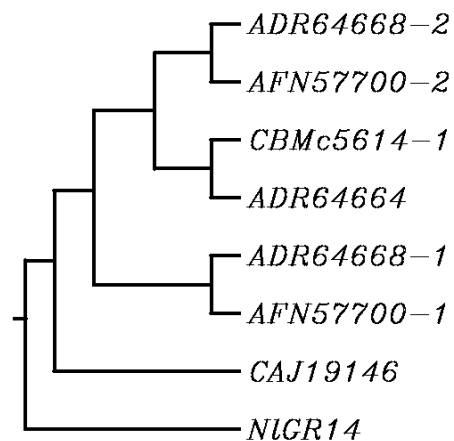

B

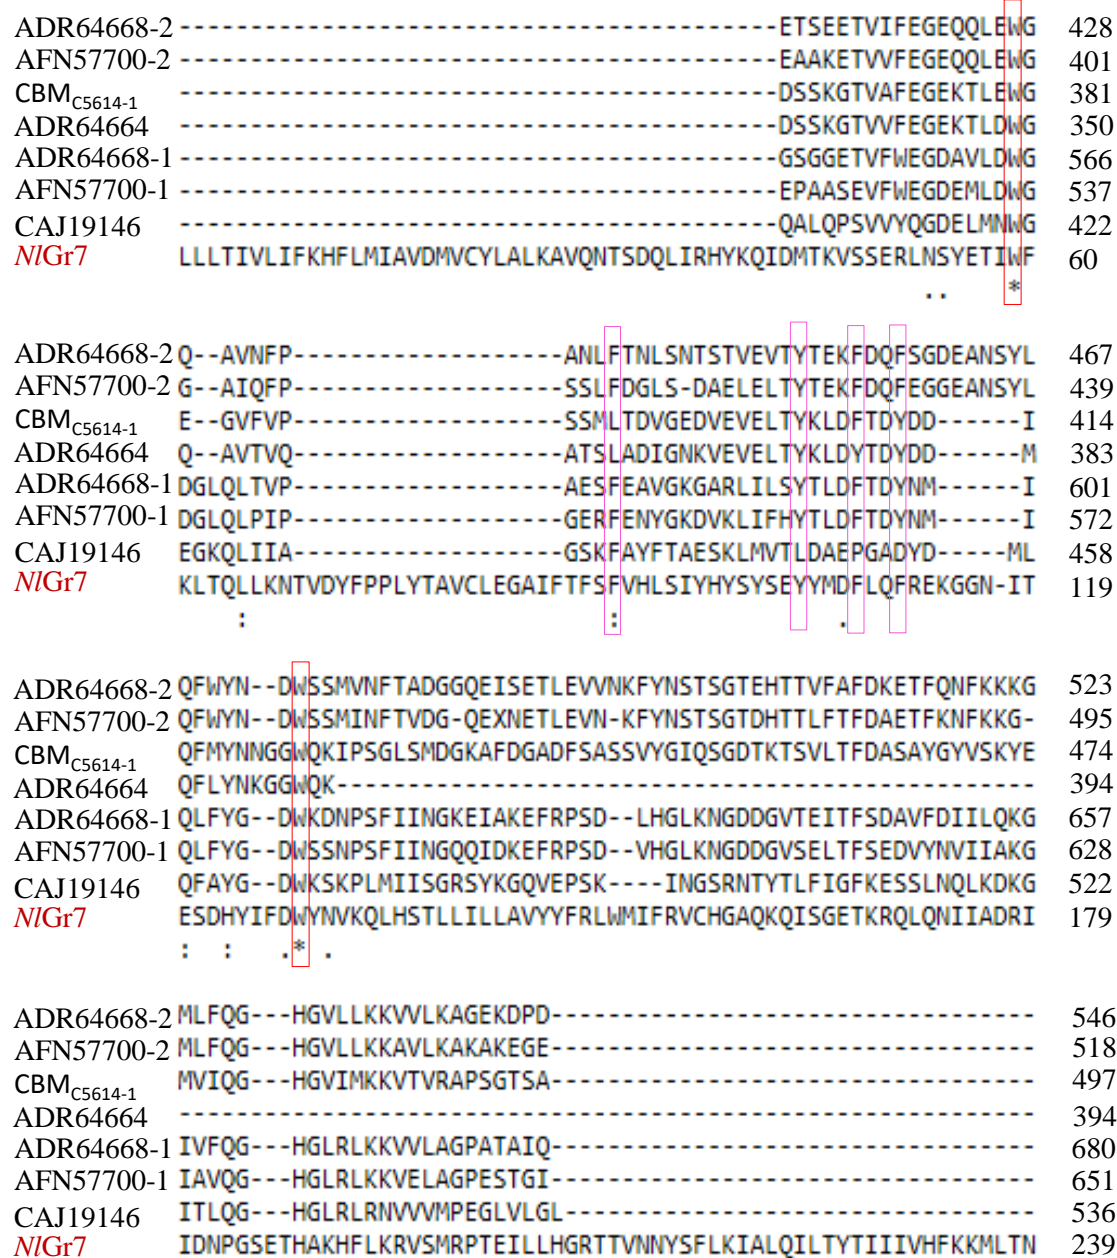



Figure 5

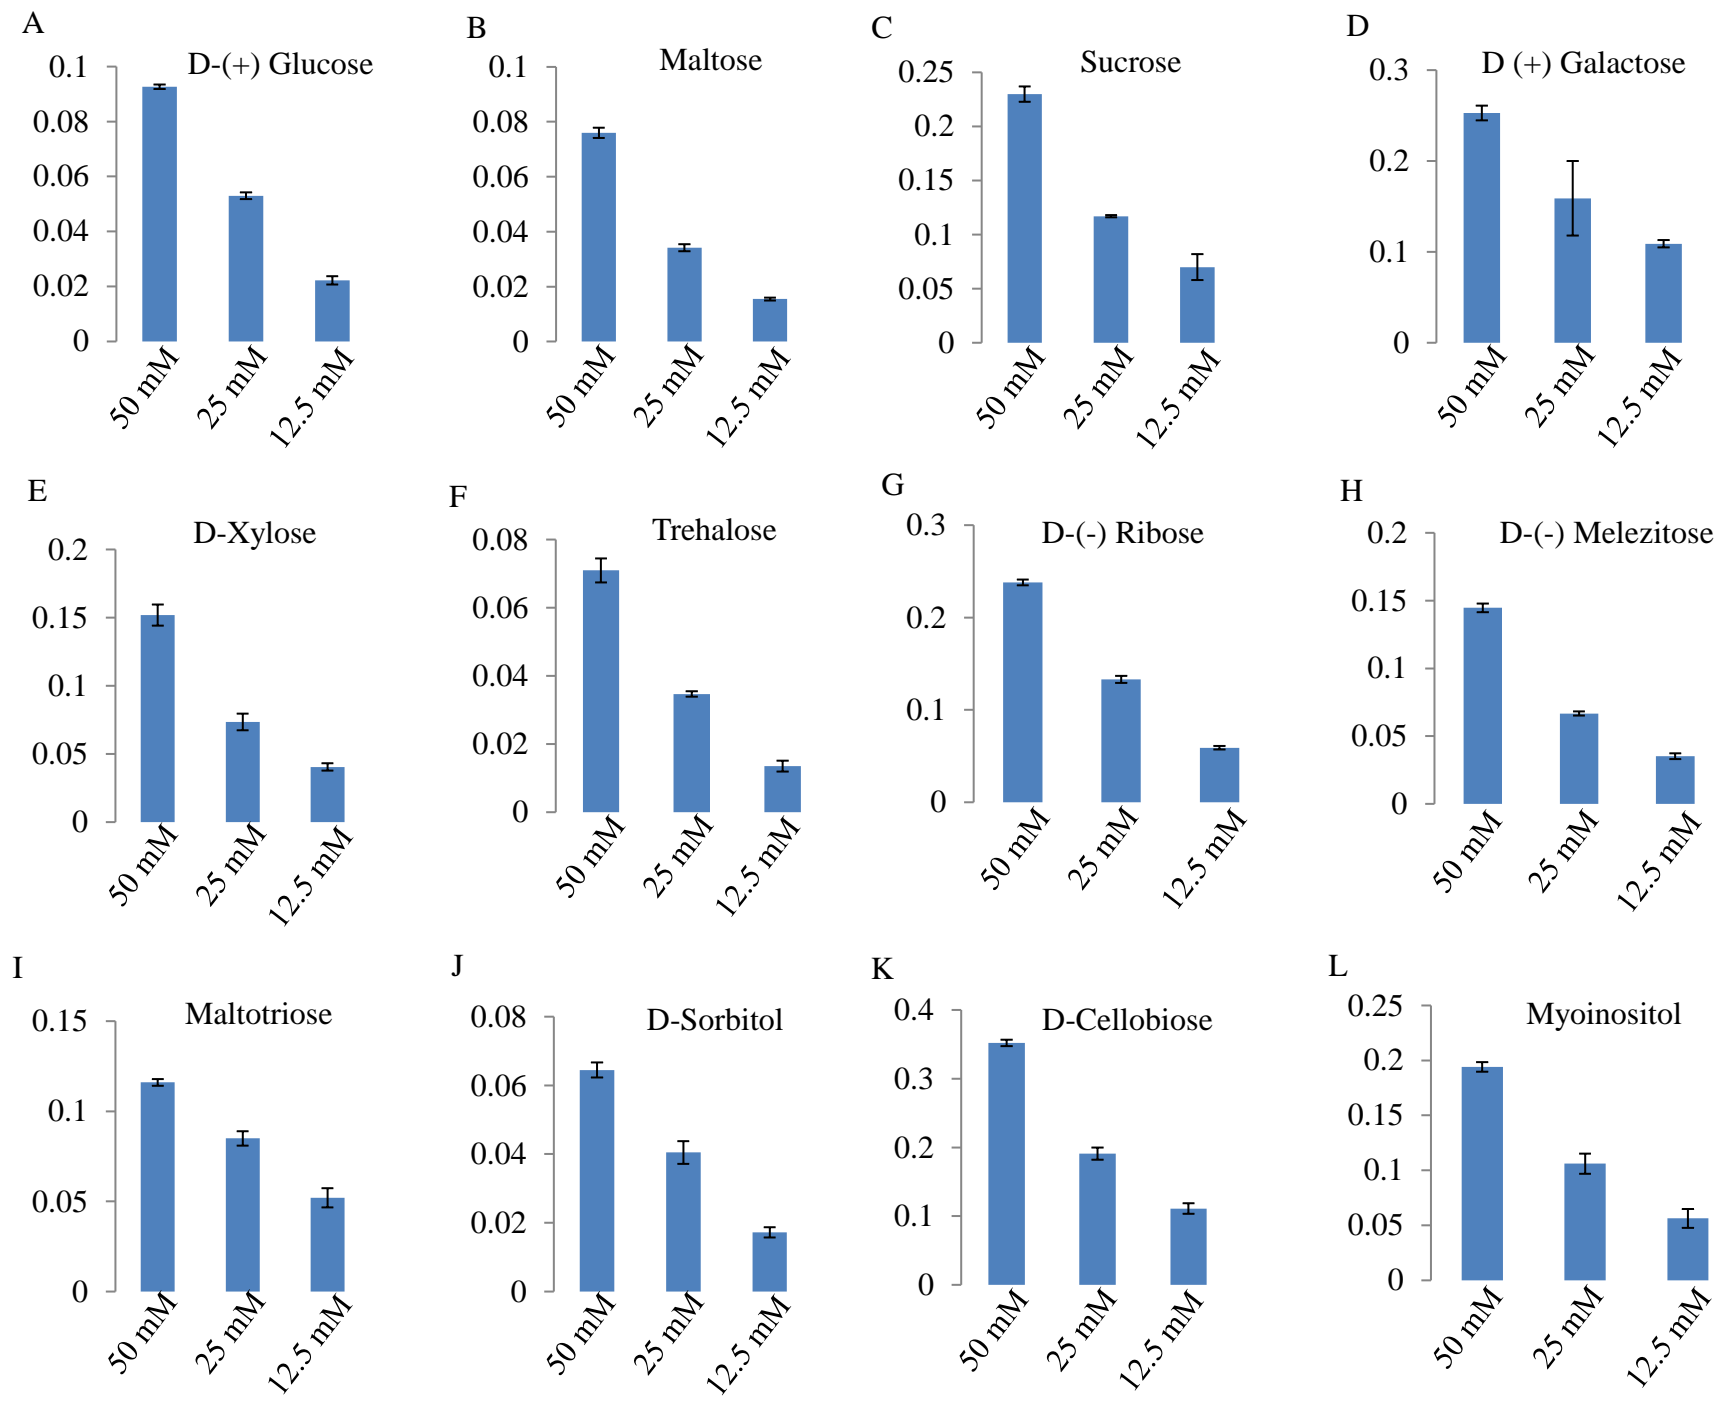

Source: https://www.biorxiv.org/content/10.1101/2020.09.05.284208v1.full.pdf
